# Supplementary material for: A New Decellularization Protocol of Porcine Aortic Valves Using Tergitol to Characterize the Scaffold with the Biocompatibility Profile Using Human Bone Marrow Mesenchymal Stem Cells
Source: MDPI journal article supplement (doi:10.3390/polym14061226), 2022-03-17
Supplement: s1 [file s1]

Supplementary Materials

# A New Decellularization Protocol of Porcine Aortic Valves Using Tergitol to Characterize the Scaffold with the Biocompatibility Profile Using Human Bone Marrow Mesenchymal Stem Cells

Marika Faggioli <sup>1,2</sup>, Arianna Moro <sup>2,3</sup>, Salman Butt <sup>1,2</sup>, Martina Todesco <sup>2,3</sup>, Deborah Sandrin <sup>2,4</sup>, Giulia Borile <sup>2,4</sup>, Andrea Bagno <sup>2,3</sup>, Assunta Fabozzo <sup>1,2</sup>, Filippo Romanato <sup>2,4</sup>, Massimo Marchesan <sup>5</sup>, Saima Imran <sup>1,2,\*</sup> and Gino Gerosa <sup>1,2</sup>

**Citation:** Faggioli, M.; Moro, A.; Butt, S.; Todesco, M.; Sandrin, D.; Borile, G.; Bagno, A.; Fabozzo, A.; Romanato, F.; Marchesan, M.; et al. A New Decellularization Protocol of Porcine Aortic Valves Using Tergitol to Characterize the Scaffold with the Biocompatibility Profile Using Human Bone Marrow Mesenchymal Stem Cells. *Polymers* **2022**, *14*, 1226. <https://doi.org/10.3390/polym14061226>

Academic Editors: Antonia Ressler and Inga Urlic

Received: 21 February 2022

Accepted: 14 March 2022

Published: 17 March 2022

**Publisher's Note:** MDPI stays neutral with regard to jurisdictional claims in published maps and institutional affiliations.

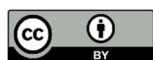

**Copyright:** © 2022 by the authors. Submitted for possible open access publication under the terms and conditions of the Creative Commons Attribution (CC BY) license (<https://creativecommons.org/licenses/by/4.0/>).

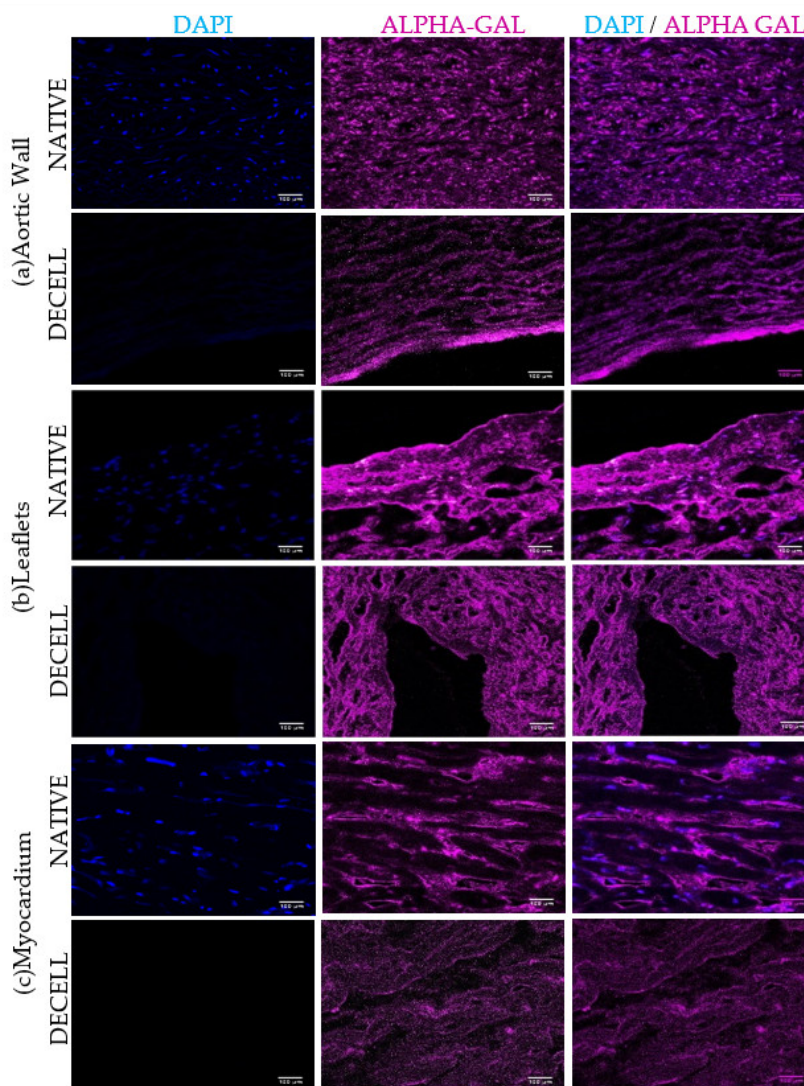

**Figure S1.** Immunofluorescence images for the expression of  $\alpha$ -gal. Confocal imaging was performed using microscope Zeiss Axio Observer LSM 800 at 20 $\times$  magnification. Comparative signals between native and decellularized tissues differ in intensity. The specificity of Alpha-gal is confirmed with the staining of Isolectin fluorophore. Images were processed with Fiji software.

Tables S1 and S2: Biomechanical data.

| sample                             | E [MPa] (1-10%) | E <sub>2</sub> [MPa] (60-100%) | FS [%]        | UTS [MPa]    | I [MPa]       |
|------------------------------------|-----------------|--------------------------------|---------------|--------------|---------------|
| AoW circumferential native         | 0.15 ± 0.07     | 0.50 ± 0.28                    | 356.1 ± 29.23 | 3.59 ± 2.37  | 502.4 ± 257.2 |
| AoW circumferential decellularized | 0.16 ± 0.05     | 0.45 ± 0.2                     | 365.7 ± 62.33 | 3.26 ± 1.067 | 465.2 ± 184.6 |
| AoW longitudinal native            | 0.13 ± 0.04     | 0.21 ± 0.8                     | 320.5 ± 30.42 | 1.71 ± 0.55  | 181.9 ± 47.47 |
| AoW longitudinal decellularized    | 0.14 ± 0.05     | 0.37 ± 0.11                    | 248.2 ± 35.71 | 1.12 ± 0.18  | 110.6 ± 24.62 |
| LL native                          | 2.88 ± 2.02     | 13.73 ± 10.35                  | 105.6 ± 22.64 | 13.9 ± 10.9  | 490.9 ± 346.9 |
| LL decellularized                  | 4.27 ± 2.142    | 13.5 ± 5.16                    | 103.2 ± 54.38 | 14.08 ± 5.01 | 711.6 ± 401.8 |

| sample                             | E [MPa] (1-10%) | E <sub>2</sub> [MPa] (60-100%) | FS [%]        | UTS [MPa]    | I [MPa]       |
|------------------------------------|-----------------|--------------------------------|---------------|--------------|---------------|
| AoW circumferential native         | 0.15 ± 0.07     | 0.50 ± 0.28                    | 356.1 ± 29.23 | 3.59 ± 2.37  | 502.4 ± 257.2 |
| AoW circumferential decellularized | 0.16 ± 0.05     | 0.45 ± 0.2                     | 365.7 ± 62.33 | 3.26 ± 1.067 | 465.2 ± 184.6 |
| AoW longitudinal native            | 0.13 ± 0.04     | 0.21 ± 0.8                     | 320.5 ± 30.42 | 1.71 ± 0.55  | 181.9 ± 47.47 |
| AoW longitudinal decellularized    | 0.14 ± 0.05     | 0.37 ± 0.11                    | 248.2 ± 35.71 | 1.12 ± 0.18  | 110.6 ± 24.62 |
| LL native                          | 2.88 ± 2.02     | 13.73 ± 10.35                  | 105.6 ± 22.64 | 13.9 ± 10.9  | 490.9 ± 346.9 |
| LL decellularized                  | 4.27 ± 2.142    | 13.5 ± 5.16                    | 103.2 ± 54.38 | 14.08 ± 5.01 | 711.6 ± 401.8 |

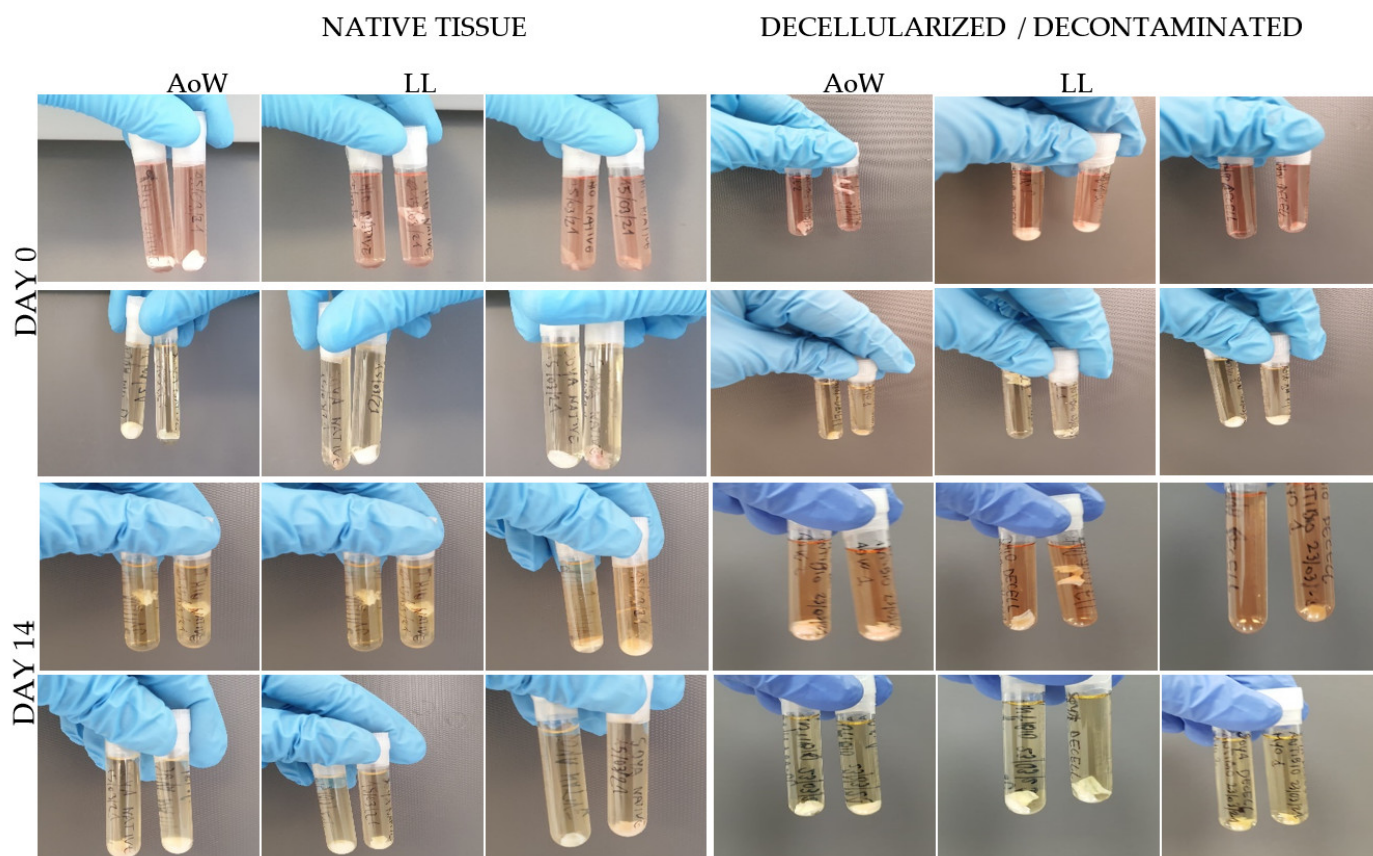

**Figure S2.** Sterility assessment of native and decellularized plus decontaminated (with Antibiotic and Antimycotic solution) samples from day 0 to day 14.

**Table S3.** List of the antibodies used in the study.

| ANTIBODY                      | CAT. NUMBER | COMPANY                     | DILUTION      |
|-------------------------------|-------------|-----------------------------|---------------|
| Anti-Collagen I               | C2456       | Sigma                       | Mouse, 1:100  |
| Anti-Collagen IV              | AMab6586    | Abcam                       | Rabbit, 1:200 |
| Anti-Elastin                  | AB2161D     | Abcam                       | Rabbit, 1:50  |
| Anti-Laminin                  | L9393       | Sigma                       | Rabbit, 1:100 |
| Anti-Alpha-gal                | LS-C63415   | LS Bio                      | 1:10          |
| DAPI                          | R37606      | ThermoFischer Scientific    | 10µg/ml       |
| Alexa Fluor 488 (anti-Rabbit) | A11008      | Invitrogen by ThermoFisher  | 1:200         |
| Alexa Fluor 555 (anti-Mouse)  | A21422      | Invitrogen by ThermoFischer | 1:300         |
